# Supplementary material for: A critical role of the mechanosensor PIEZO1 in glucose-induced insulin secretion in pancreatic β-cells
Source: PubMed Central journal article supplement (PMC9307633; doi:10.1038/s41467-022-31103-y), 2022-07-22
Supplement: 41467_2022_31103_MOESM1_ESM.pdf [file 41467_2022_31103_MOESM1_ESM.pdf]

## **Supplementary Information**

### **A critical role of the mechanosensor Piezo1 in glucose-induced insulin secretion in pancreatic $\beta$ -cells**

Yingying Ye, Mohammad Barghouth, Haiqiang Dou, Cheng Luan, Yongzhi Wang, Alexandros Karagiannopoulos, Xiaoping Jiang, Ulrika Krus, Malin Fex, Quan Zhang, Lena Eliasson, Patrik Rorsman, Enming Zhang, Erik Renström

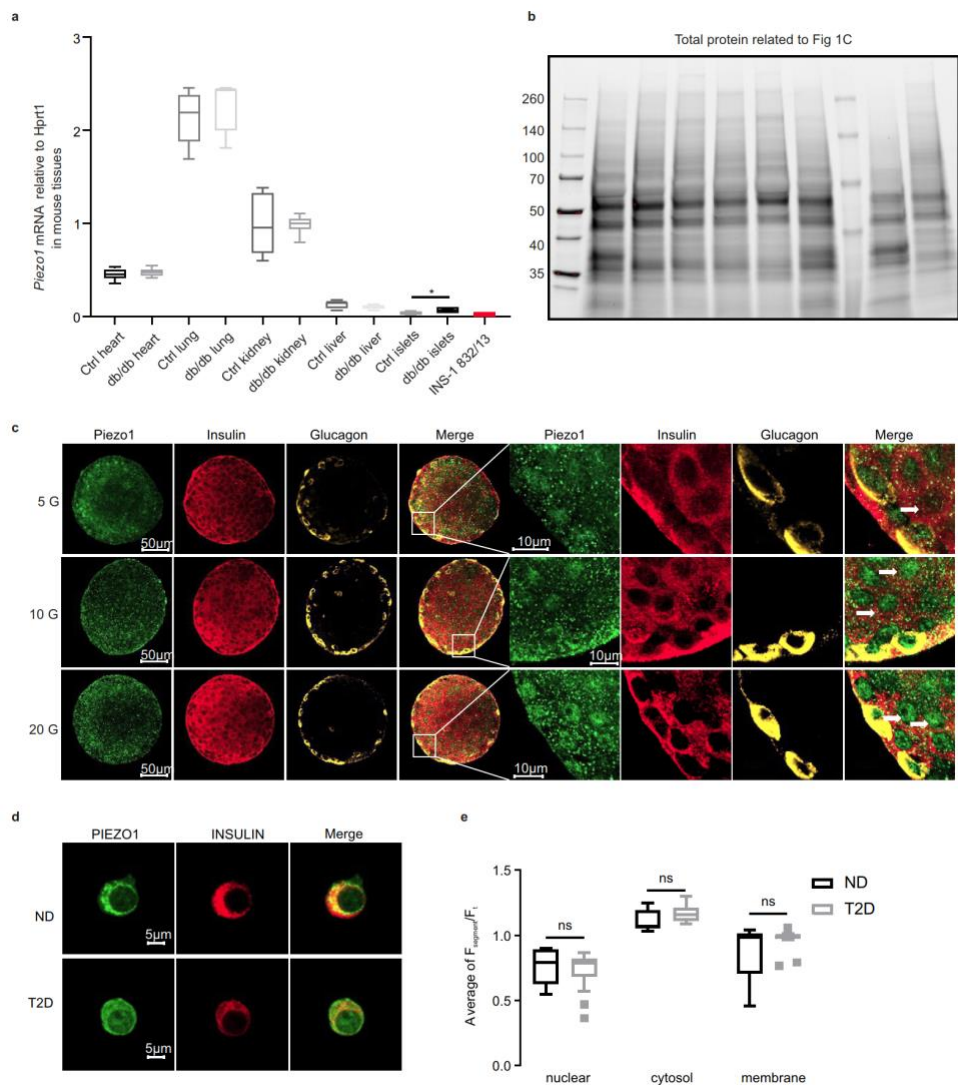

**Figure S1 Piezo1 expression in different tissues.**

**a.** Messenger RNA expression of *Piezo1* in C57BL/6J (Ctrl) and *db/db* mouse tissue (n=3),  $p=0.026$  between the expression in islets from Ctrl and *db/db* mice.

**b.** Total protein for normalization in Figure 1c.

**c.** Whole mouse islet immunostaining for PIEZO1 (green), insulin (red) and glucagon (yellow) after culture in 5, 10 or 20 mM glucose, as indicated. Images are representative of 5 experiments for each condition.

**d.** Immunostaining of PIEZO1 (green) and insulin (red) in human islets from healthy donors (ND) and donors with type 2 diabetes (T2D).

**e.** The ratio of fluorescence for PIEZO1 in the nucleus, cytosol and membrane normalized to the total PIEZO1 fluorescence calculated for **d** (n=12 and 15 cells for ND and T2D,

respectively).

Data are presented as mean values  $\pm$  S.E.M. Statistical significance were evaluated using two-tailed unpaired Student's *t*-test in e, ns: not significant.

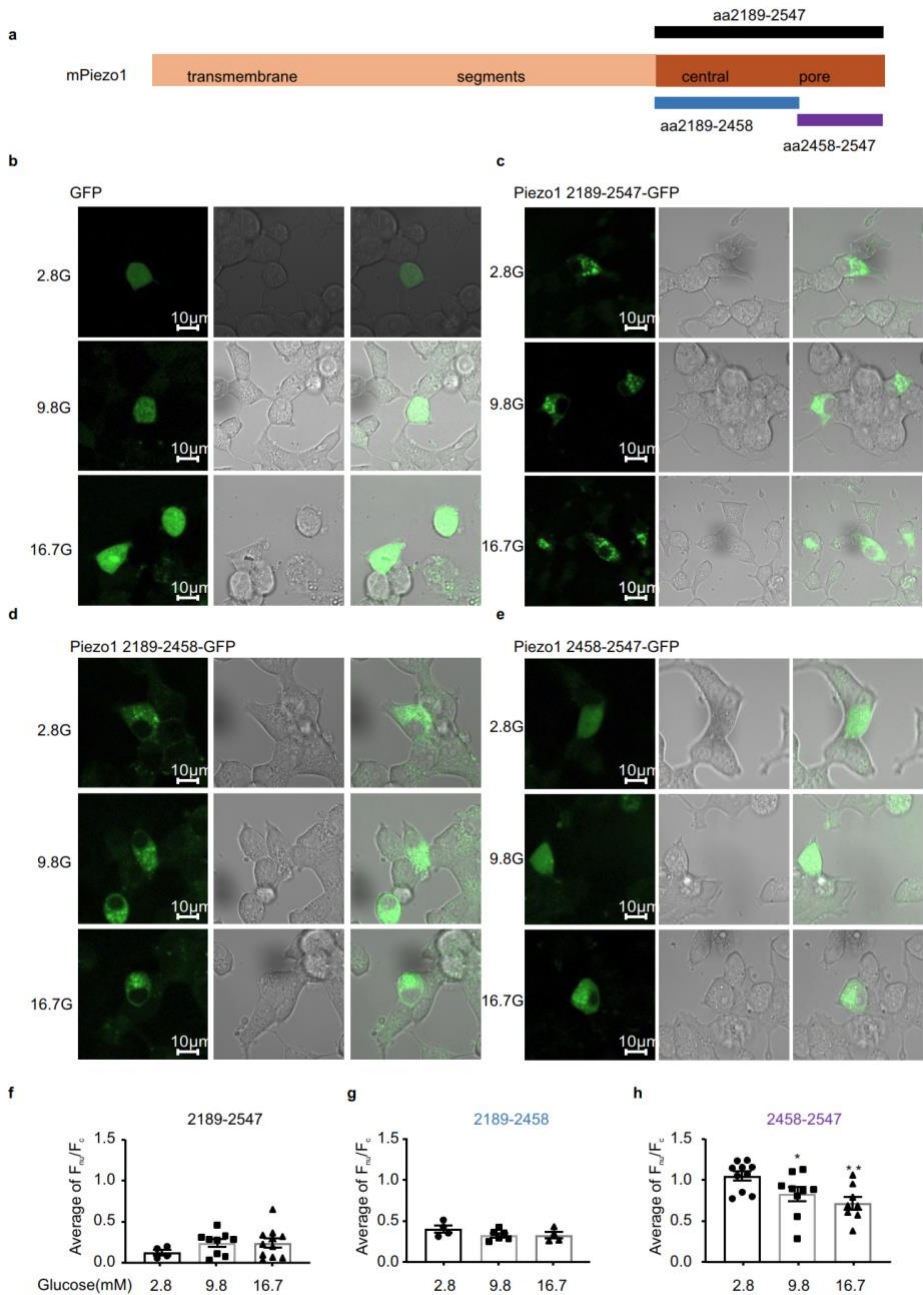

**Figure S2 Translocation of Piezo1 fragments in INS-1 832/13 cells.**

**a.** Cartoon of mouse Piezo1 and fragments used.

**b-e.** GFP fluorescence for control-GFP (empty vector) (**b**), Piezo1 aa2189-2547-GFP (**c**), Piezo1 aa2189-2458-GFP (**d**), Piezo1 aa2458-2547-GFP (**e**).

**f.** Ratio of intensity for GFP tagged Piezo1 aa2458-2547 in nucleus over that in the cytosol in (**c**) (n=4, 9 and 11 cells in 2.8 mM, 9.8 mM or 16.7 mM glucose (G));

**g:** As in (**f**), but for (**d**; Piezo1 aa2189-2458-GFP) n=4, 6 and 4 cells, respectively;

**h:** As in (**f**), but for (**e**; Piezo1 aa2458-2547-GFP) n=10, 9 and 8 cells, respectively, p values for the comparison of the ratios between 2.8 and 9.8, 16.7 mM G were 0.0456, 0.0025, respectively.

Data are presented as mean values  $\pm$  S.E.M. Statistical significances were evaluated using two-tailed unpaired Student's *t*-test in **f**, **g**, **h**.

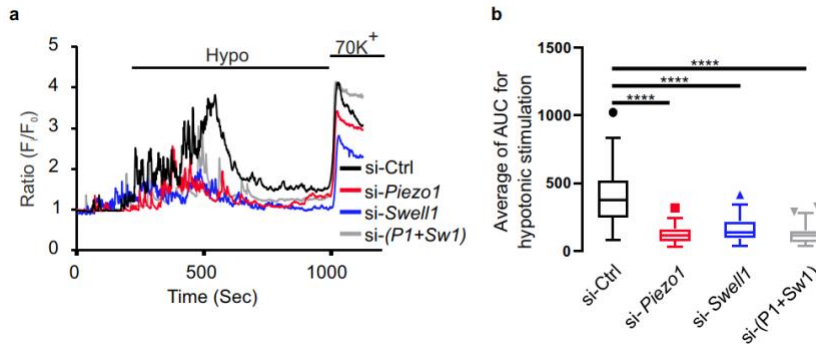

**Figure S3 Piezo1 and Swell1 contribute in parallel to  $Ca^{2+}$  signaling in response to hypotonic stimulation**

**a.** Traces represent the ratio of Fura-2 AM fluorescence ( $F_i$ ) normalized to the basal ( $F_0$ ) upon perfusion of 2.8 mM glucose (0-250 s), hypotonic solutions (250-750 s), followed by stimulation with 70 mM  $K^+$  in negative control (si-Ctrl; black), *Piezo1*-silenced (si-*Piezo1*; red), *Swell1*-silenced (si-*Swell1*; dark blue), *Piezo1* and *Swell1*-silenced (si-*P1+Sw1*; grey) INS-1 832/13 cells.

**b.** The average of area under the curve (AUC) under hypotonic stimulation for **a** ( $n = 73, 51, 48$  and  $49$  cells for si-Ctrl, si-*Piezo1*, si-*Swell1*, si-*P1+Sw1*, respectively). Color code as in **a**.  $p$  values for the comparison of AUC in all conditions to that in si-Ctrl were  $<0.0001$ .

Data are presented as mean values  $\pm$  S.E.M. Statistical significance were evaluated using two-sided one-way ANOVA multiple comparisons for figure **b**, \*\*\*\* $p < 0.0001$ .

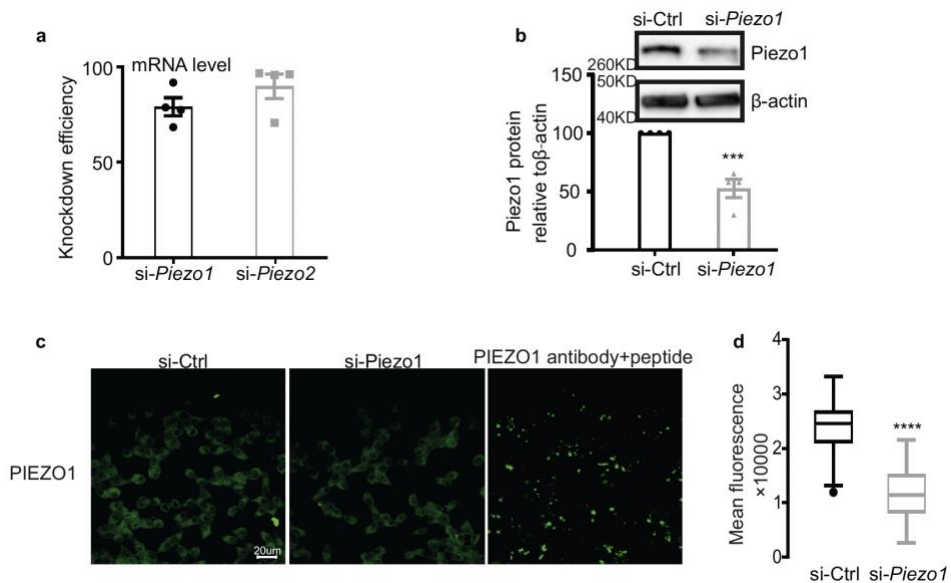

**Figure S4 Assessment of Piezo1 or Piezo2 knockdown efficiency in INS-1 832/13 cells.**

**a.** Knockdown efficiency, assessed as mRNA reduction, in *Piezo1* or *Piezo2*-silenced INS-1 832/13 cells (n=4).

**b.** Knockdown efficiency, assessed as reduction of PIEZO1 protein as compared to negative siRNA (si-Ctrl) treated INS-1 832/13 cells (n=4), p=0.0009.

**c.** Immunostaining of PIEZO1 in si-Ctrl, *Piezo1*-silenced INS-1 832/13 cells. In the right panel, Fam38a/PIEZO1 fusion protein was used to block PIEZO1 antibody prior to incubation with si-Ctrl treated INS-1 832/13 cells.

**d.** Mean fluorescence in **c** (n=30 cells in each group), p<0.0001.

Data are presented as mean values  $\pm$  S.E.M. Statistical significances were evaluated using two-tailed unpaired Student's *t*-test, \*\*\*p<0.001, \*\*\*\*p<0.0001.

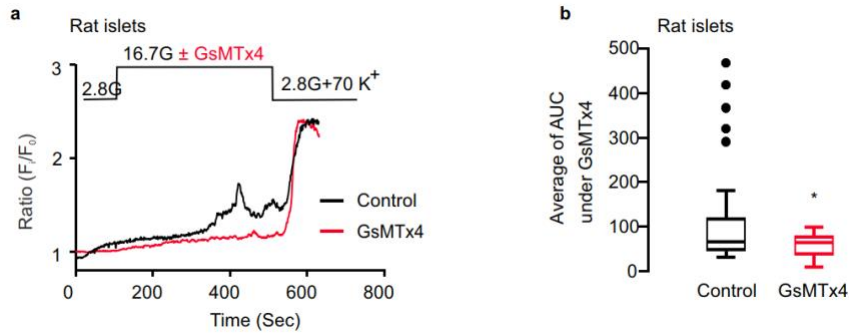

**Figure S5. Effects of GsMTx4 on Ca<sup>2+</sup> in rat islets**

**a.** Representative traces upon perfusion of 2.8 mM glucose (~100 s), 16.7 mM glucose buffer with or without GsMTx4 (~400 s) and followed by 70 mM K<sup>+</sup> stimulation in dispersed rat islet cells.

**b.** The average of area under the curve (AUC) under GsMTx4 treatment in **a** (n=7 cells for control, n=8 cells for GsMTx4), p=0.0238.

Data are presented as mean values ± S.E.M. Statistical significance were evaluated using two-tailed unpaired Student's *t*-test, \*p<0.05.



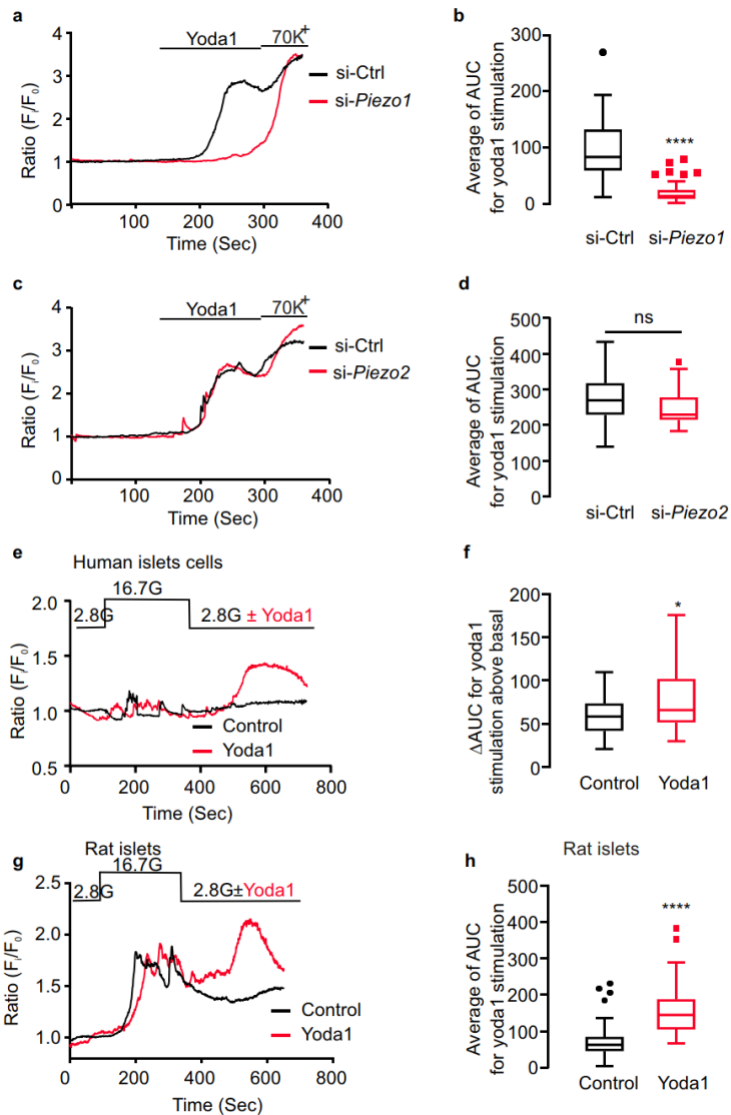

**Figure S6 Effects of yoda1 and GsMTx4 on Ca<sup>2+</sup> signaling in rat islet and INS-1 832/13 cells.**

**a.** Traces represent the ratio of Fura-2 AM fluorescence (F<sub>i</sub>) normalized to the basal level (F<sub>0</sub>) vs time upon perfusion of 2.8 mM glucose Krebs buffer (~150 s), followed by the addition of 25 μM yoda1 and ending with 70 mM K<sup>+</sup> depolarizing buffer in *Piezo1*-silenced cells versus non-targeted siRNA treatment (si-Ctrl).

**b.** The average of area under the curve (AUC) for yoda1 stimulation in *Piezo1*-silenced cells versus si-Ctrl in (a) (n=63 cells, p<0.0001).

**c.** As in (a) but comparing negative control to *Piezo2* silencing.

- d.** As in **(b)** but comparing negative control to *Piezo2* silencing (n=56 cells).
- e.**  $[Ca^{2+}]_i$  in human  $\beta$ -cells superfused with medium containing 2.8 mM glucose or 16.7 mM glucose (G) as indicated and following the addition of yoda1 (red) or solvent (DMSO) (black). Yoda1 was introduced in the medium at t=400 s.
- f.**  $\Delta AUC$  for the increase in response to yoda1 (red) compared to control (DMSO alone; black) (n=27 and 31 cells for control and yoda1, respectively, p=0.0192)
- g.** Representative traces upon perfusion of 2.8 mM glucose (~100 s), 16.7 mM glucose (~300 s) and followed by addition of 50  $\mu$ M yoda1 or DMSO as control in 2.8 mM glucose Krebs buffer in dispersed rat islet cells. The cells are assumed to be  $\beta$ -cells bases on their responsiveness to high glucose.
- h.** The cells responding to 16.7 mM glucose were analyzed for the average of area under the curve (AUC) for yoda1 stimulation in **e** (n=58 cells for each condition, p<0.0001). Data are presented as mean values  $\pm$  S.E.M. Statistical significance were evaluated using two-tailed unpaired Student's *t*-test in **b, d, f, h**, \*p<0.05, \*\*\*\*p<0.0001.

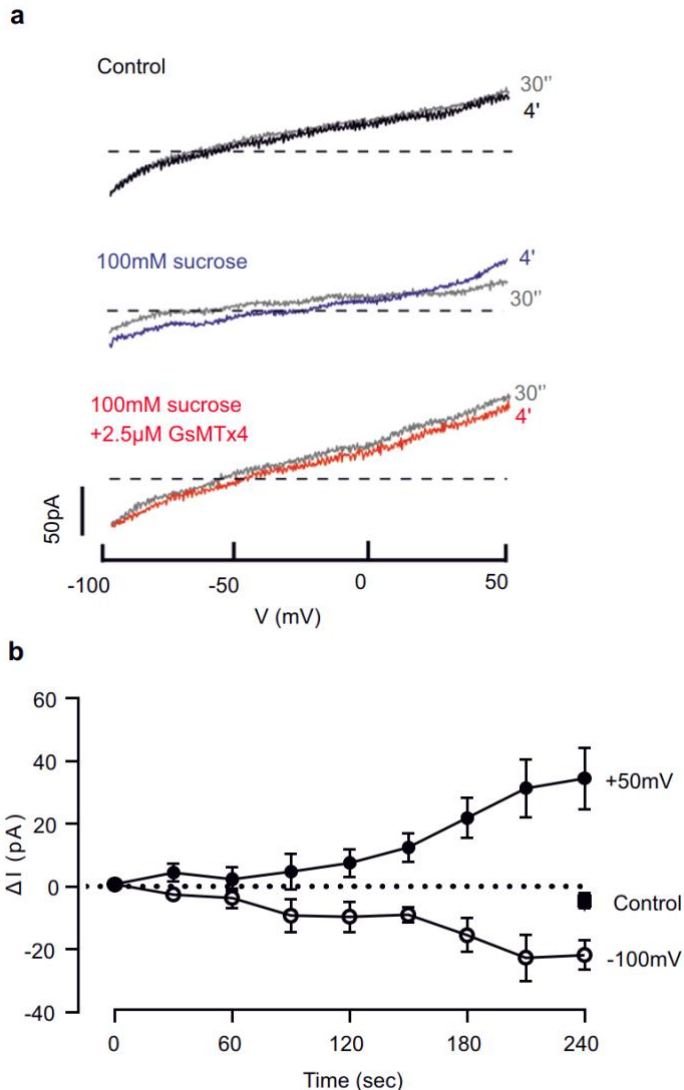

**Figure S7. Swelling-induced currents in primary mouse  $\beta$ -cells.**

**a.** Whole-cell currents of  $\beta$ -cells during 100-ms voltage ramps between -100 and 50 mV recorded  $\leq 30$  s and 4 min after establishment after the whole-cell configuration in cells infused with normal intracellular solution (control,  $n=4$ ; top) or intracellular solution supplemented with 100 mM sucrose ( $n=5$ ; middle) in the presence of 2.5 $\mu$ M GsMTx4 in the extracellular solution ( $n=5$ ; lower).

**b.** Time course of subtracted currents (as in main Figure 4o) at -100mV and +50mV at the time of establishment of the whole-cell configuration ( $t=0$  s) and at later times ( $n=5$  cells). Squares show changes in membrane currents at -100 and +50 mV over 4 min in control cells (no sucrose;  $n=4$ ). Mean values  $\pm$  S.E.M.

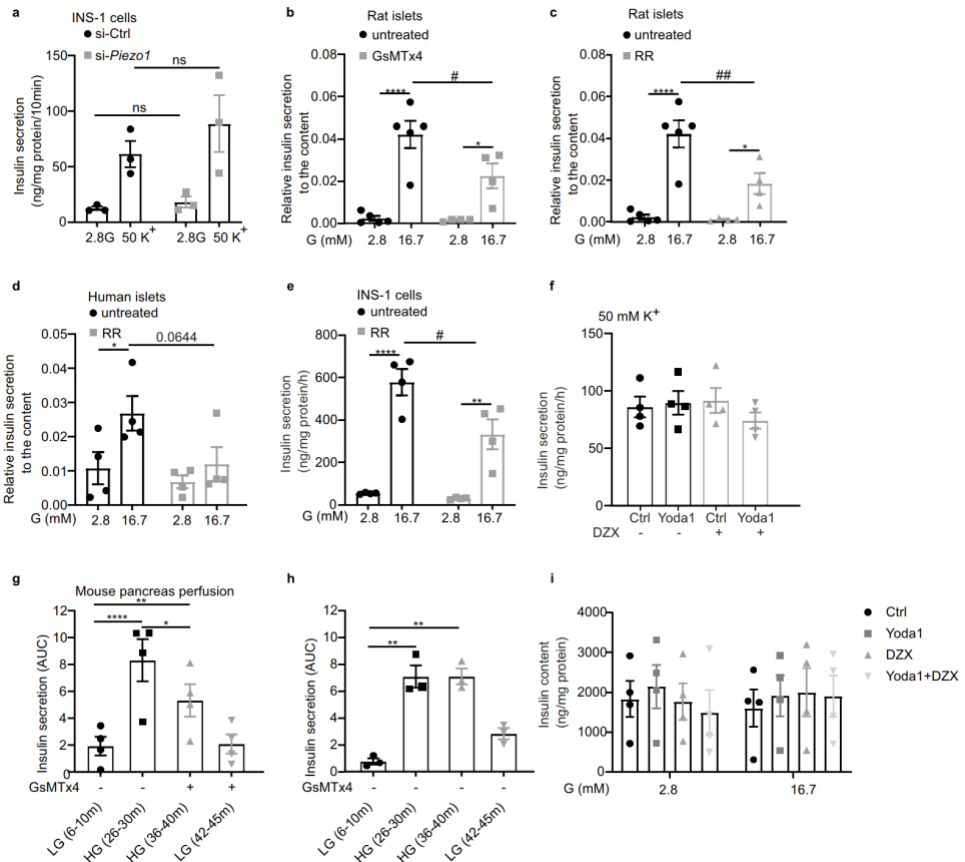

**Figure S8 Effects of inhibition of Piezo1 on glucose-stimulated insulin secretion.**

**a.** Insulin secretion in INS-1 832/13 cells in 2.8 mM glucose or 50 mM  $K^+$  after silencing of *Piezo1* versus si-Ctrl (n=3).

**b.** Insulin secretion in rat islets in 2.8 mM or 16.7 mM glucose with normal buffer (n=5) or buffer with GsMTx4 (n=4), p values for the comparison between 2.8 and 16.7 mM G without/with GsMTx4 were <0.0001, 0.017, respectively, that between untreated and GsMTx4 treatment under 16.7 mM G was 0.015.

**c.** Insulin secretion in rat islets in 2.8 mM or 16.7 mM glucose with normal buffer (n=5) or buffer with Ruthenium Red (RR, n=4), p values for the comparison between 2.8 and 16.7 mM G without/with RR were <0.0001, 0.0375, respectively, that between untreated and RR treatment under 16.7 mM G was 0.0034.

**d.** As in **c** but in human islets (n=4), p values for the comparison between 2.8 and 16.7 mM G in untreated islets was 0.045, respectively, that between untreated and RR treatment under 16.7 mM G was 0.0644.

**e.** As in **c** but in INS-1 832/13 cells (n=4), p values for the comparison between 2.8 and 16.7 mM G without/with RR were <0.0001, 0.0033, respectively, that between untreated and RR treatment under 16.7 mM G was 0.014.

**f.** Insulin secretion in INS-1 832/13 cells in the presence of 50 mM  $K^+$  in the absence and presence of yodal (25  $\mu$ M) and/or diazoxide (200  $\mu$ M; DZX) as indicated (n=4).

Diazoxide and yoda1 were dissolved in DMSO; control media contained the same amount of DMSO.

**g.** The total insulin release in perfusion of pancreas in the time period of  $t = 6-10, 26-30, 36-40$  (with GsMTx4) and  $42-45$  min (with GsMTx4), respectively in **Figure 5d** (stippled areas;  $n=4$ ),  $p$  values for the comparison between LG (6-10m) and HG (26-30m), HG (36-40m), were  $<0.0001, 0.0052$ , respectively, that between HG (26-30m) and HG (36-40m) was  $0.011$ .

**h.** As in **g** but for the experiment treated without GsMTx4 as indicated in **Figure 5e** (stippled areas;  $n=3$ ),  $p$  values for the comparison between LG (6-10m) and HG (26-30m), HG (36-40m), were  $0.001, 0.001$ , respectively.

**i.** Insulin content related to **Figure 5c** in Ctrl, yoda1, DZX, and yoda1+DZX treated cells ( $n=4$ ).

Data are presented as mean values  $\pm$  S.E.M. Statistical significances were evaluated by two-way ANOVA multiple comparisons, except for one-way ANOVA multiple comparisons in **f**, \*, the significance compared between 2.8 mM and 16.7 mM glucose, #, the significance compared between treatments with and without pharmacological drugs. All statistical tests used were two-sided unless otherwise indicated. \* $p<0.05$ , \*\* $p<0.01$ , \*\*\*\* $p<0.0001$ . ns: not significant.

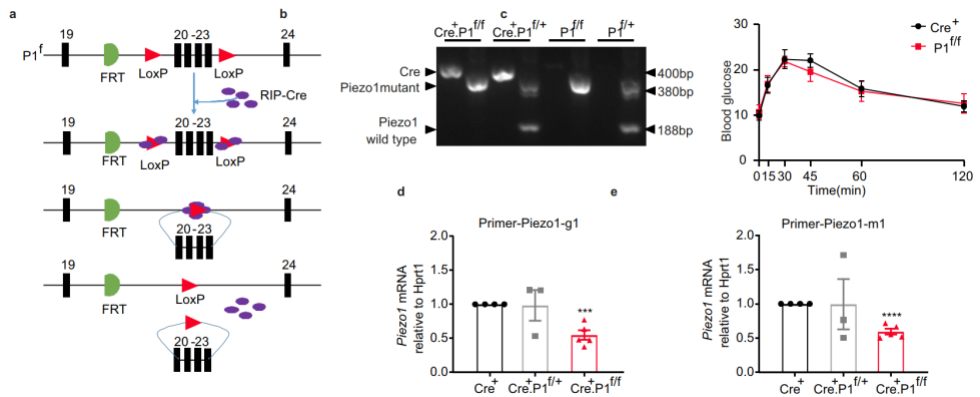

**Figure S9 Verification of the  $\beta$ -cell specific *Piezo1* knock-out mice and IPGTT for Ctrl and floxed *Piezo1* mice.**

**a.** The floxed and null alleles of *Piezo1* following recombination with RIP-Cre recombinase between LoxP sites (from exon 20 to 23), so part of *Piezo1* from exon 19 to 24 was shown, FRT: FLP recombinase target.

**b.** Genotyping by PCR using tail biopsies from RIP-Cre<sup>+</sup>.P1<sup>f/f</sup>, RIP-Cre<sup>+</sup>.P1<sup>f/+</sup>, P1<sup>f/f</sup>, P1<sup>f/+</sup> mice.

**c.** Blood glucose post-IPGTT in male RIP-Cre<sup>+</sup> (black) or floxed *Piezo1* mice (red) (n=6 and 3 for Cre<sup>+</sup> and P1<sup>f/f</sup> mice, respectively).

**d.** Real-time qPCR analysis of *Piezo1* in isolated islets of RIP-Cre<sup>+</sup>, Cre<sup>+</sup>.P1<sup>f/+</sup>, Cre<sup>+</sup> P1<sup>f/f</sup> mice using primers targeting exons 21-22 (Primer-P1-g1). n=4, 3 and 5 for Cre<sup>+</sup>, Cre<sup>+</sup>.P1<sup>f/+</sup> and Cre<sup>+</sup> P1<sup>f/f</sup> islets, respectively, p=0.0007.

**e.** As in (c) but using primers targeting exons 22-23 (Primer-P1-m1). n=4, 3 and 5 for Cre<sup>+</sup>, Cre<sup>+</sup>.P1<sup>f/+</sup> and Cre<sup>+</sup> P1<sup>f/f</sup> islets, respectively, p<0.0001.

Data are presented as mean values  $\pm$  S.E.M. Statistical significances were evaluated by two-tailed unpaired Student's t-test in **d** and **e**, \*\*\*p<0.001, \*\*\*\*p<0.0001.

a

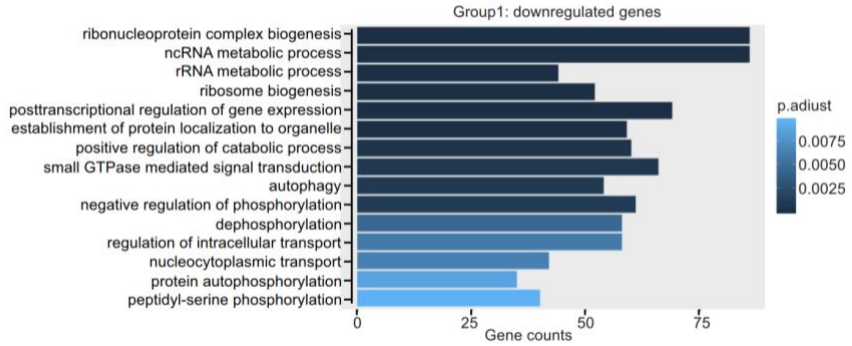

b

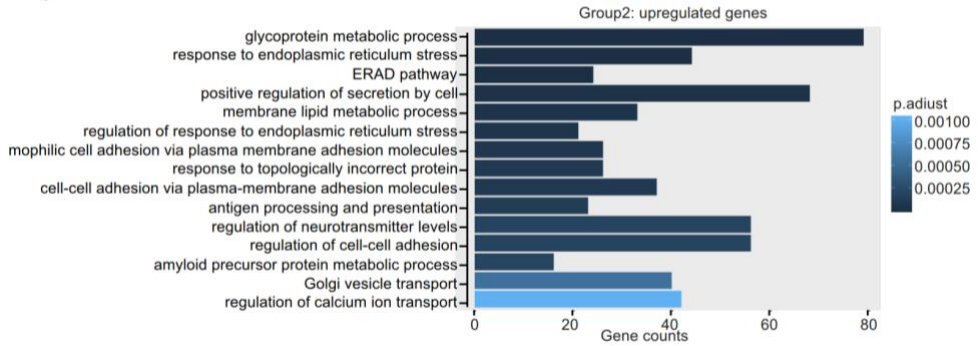

**Figure S10. Gene Ontology terms enrichment for RNA-sequencing in *Piezo1*-silenced cells.**

**a.** The most downregulated genes that involved in the indicated signal pathways.

**b.** Same as in **a**, but the signal pathways involved the most upregulated genes.

Supplemental Table 1

| Gender | Age | Human donor information |          |             |              |     |
|--------|-----|-------------------------|----------|-------------|--------------|-----|
|        |     | BMI                     | HbA1c(%) | Blood group | Non-diabetic | T2D |
| Male   | 57  | 26.4                    | 5.5      | A           | 1*           | 0*  |
| Male   | 39  | 29                      | 4.2      | A           | 1            | 0   |
| Female | 53  | 28.7                    | 5.2      | AB          | 1            | 0   |
| Female | 68  | 18.7                    | 5.5      | A           | 1            | 0   |
| Male   | 63  | 26                      | 6.6      | A           | 0            | 1   |
| Male   | 66  | 19.7                    |          | O           | 1            | 0   |
| Male   | 62  | 27.8                    | 5.5      | O           | 1            | 0   |
| Male   | 78  | 20.1                    |          | A           | 1            | 0   |
| Male   | 68  | 23.1                    | 5.5      | A           | 1            | 0   |
| Female | 54  | 33.7                    | 5.8      | B           | 1            | 0   |
| Female | 58  | 25.8                    | 6.1      | A           | 1            | 0   |
| Male   | 64  | 27.2                    | 5.5      | A           | 1            | 0   |
| Male   | 62  | 24                      | 5.5      | O           | 1            | 0   |
| Male   | 62  | 34.9                    | 6.4      | A           | 0            | 1   |
| Female | 60  | 26.1                    | 6.1      | B           | 1            | 0   |
| Male   | 68  | 27.8                    | 6.4      | O           | 1            | 0   |
| Female | 65  | 33.3                    | 7.3      | A           | 0            | 1   |
| Male   | 45  | 23.5                    | 7.3      | A           | 0            | 1   |
| Male   | 55  | 27.8                    | 5.7      | O           | 1            | 0   |
| Male   | 63  | 18                      | 5.7      | O           | 1            | 0   |
| Male   | 66  | 26.6                    | 6.1      | O           | 1            | 0   |
| Male   | 67  | 26.1                    | 5.6      | O           | 1            | 0   |
| Male   | 57  | 21.6                    | 6.6      | O           | 0            | 1   |
| Male   | 61  | 37                      | 6.1      | O           | 1            | 0   |
| Male   | 58  | 26.8                    | 6        | A           | 0            | 1   |
| Male   | 65  | 23.1                    | 5.6      | A           | 1            | 0   |
| Male   | 57  | 26.4                    | 5.5      | A           | 1            | 0   |

(\* , 1 means yes and 0 means no)



Supplemental Table 2-4:

Differential gene expression was performed with Deseq2 (PMID: 25516281). Briefly, after normalization of the raw gene counts with a sample-specific size factor, normalized counts were modeled using the negative binomial distribution and the Wald test was performed on the model coefficients to compare gene expression between conditions. The p-values attained by the Wald test were corrected for multiple testing using the Benjamini-Hochberg method.

Supplemental Table 2

| Differentially expressed genes in si- <i>Piezo1</i> samples |                 |                             |          |
|-------------------------------------------------------------|-----------------|-----------------------------|----------|
| Rank                                                        | Gene_Name       | log <sub>2</sub> FoldChange | padj     |
| 1                                                           | Slc40a1         | 5,711                       | 0,01758  |
| 2                                                           | AABR07044397.1  | 4,564                       | 0,035236 |
| 3                                                           | Cartpt          | 4,208                       | 0        |
| 4                                                           | Lgals5          | 3,739                       | 0        |
| 5                                                           | Sftpa1          | 3,703                       | 0,011455 |
| 6                                                           | Gbp6            | 3,656                       | 0,024215 |
| 7                                                           | NEWGENE_1306399 | -3,514                      | 0,006709 |
| 8                                                           | Gabre           | 3,493                       | 0,012917 |
| 9                                                           | Lpar6           | 3,466                       | 0,020677 |
| 10                                                          | Gast            | 3,444                       | 0        |
| 11                                                          | RGD1559962      | -3,368                      | 0,029664 |
| 12                                                          | Krt78           | 3,163                       | 0,027815 |
| 13                                                          | C1rl            | 2,863                       | 0,027798 |
| 14                                                          | Crispld2        | -2,851                      | 0,033635 |
| 15                                                          | AABR07044631.2  | 2,81                        | 0,002746 |
| 16                                                          | Ggt1            | 2,748                       | 0,014224 |
| 17                                                          | AABR07008670.1  | 2,723                       | 0,036213 |
| 18                                                          | Sds             | 2,719                       | 0,000014 |
| 19                                                          | Fgg             | 2,677                       | 0,016029 |
| 20                                                          | Aldh3b1         | 2,662                       | 0        |
| 21                                                          | Ampd3           | -2,656                      | 0,007487 |
| 22                                                          | Pcdh10          | 2,649                       | 0,013767 |
| 23                                                          | Gper1           | 2,604                       | 0        |
| 24                                                          | LOC100359515    | 2,558                       | 0,032669 |
| 25                                                          | AABR07018078.1  | 2,542                       | 0        |
| 26                                                          | Spata31d3       | -2,515                      | 0,017123 |
| 27                                                          | Lamc3           | -2,498                      | 0,00069  |
| 28                                                          | Fgr             | 2,491                       | 0,048021 |
| 29                                                          | AC120291.4      | -2,489                      | 0,048841 |
| 30                                                          | Gask1b          | 2,484                       | 0,0266   |
| 31                                                          | Wnt10b          | 2,428                       | 0,000471 |
| 32                                                          | Zim1            | 2,418                       | 0,000026 |
| 33                                                          | Ntsr1           | 2,405                       | 0        |
| 34                                                          | Chrna3          | 2,393                       | 0,001141 |
| 35                                                          | Mlph            | 2,354                       | 0,000333 |
| 36                                                          | Mmd2            | 2,344                       | 0        |
| 37                                                          | Sun3            | 2,322                       | 0,022555 |
| 38                                                          | Fbn2            | 2,317                       | 0        |
| 39                                                          | Cfap73          | 2,292                       | 0,046442 |
| 40                                                          | Ces1f           | 2,263                       | 0,028431 |
| 41                                                          | AABR07034428.1  | 2,255                       | 0,000013 |
| 42                                                          | Cyp1b1          | 2,255                       | 0,000119 |
| 43                                                          | Calhm2          | -2,22                       | 0,000001 |
| 44                                                          | LOC497963       | 2,209                       | 0,025294 |
| 45                                                          | Lcn1            | 2,197                       | 0,000121 |
| 46                                                          | Calhm1          | -2,178                      | 0,019483 |
| 47                                                          | Esr1            | 2,154                       | 0,010679 |
| 48                                                          | Col5a1          | 2,11                        | 0,026281 |
| 49                                                          | Setdb2          | 2,108                       | 0,007601 |
| 50                                                          | Dpp4            | -2,082                      | 0,0497   |
| 51                                                          | Ifi47           | 2,072                       | 0        |
| 52                                                          | Mest            | 2,052                       | 0        |
| 53                                                          | Pdgfrb          | -2,046                      | 0,001909 |
| 54                                                          | Fam151a         | 2,04                        | 0        |
| 55                                                          | Prr35           | -2,011                      | 0,047072 |

| Differentially expressed genes in si-Piezo1 samples |                |                             |          |
|-----------------------------------------------------|----------------|-----------------------------|----------|
| Rank                                                | Gene_Name      | log <sub>2</sub> FoldChange | padj     |
| 56                                                  | Gbp7           | 1,993                       | 0,003108 |
| 57                                                  | Chrb4          | 1,957                       | 0        |
| 58                                                  | Rgs5           | 1,939                       | 0,00001  |
| 59                                                  | Cd7            | 1,923                       | 0,000502 |
| 60                                                  | Ramp1          | -1,918                      | 0        |
| 61                                                  | Clcnkb         | 1,916                       | 0,008117 |
| 62                                                  | Rxfp3          | 1,916                       | 0,000071 |
| 63                                                  | Ptprb          | 1,894                       | 0        |
| 64                                                  | Rgs4           | 1,882                       | 0,008116 |
| 65                                                  | Ptn            | 1,88                        | 0        |
| 66                                                  | Emp1           | -1,866                      | 0        |
| 67                                                  | P2rx2          | 1,839                       | 0,000752 |
| 68                                                  | Asb4           | 1,838                       | 0,007424 |
| 69                                                  | Pzp            | 1,835                       | 0,000906 |
| 70                                                  | AABR07008293.4 | 1,822                       | 0,006791 |
| 71                                                  | Gfra2          | 1,811                       | 0,005506 |
| 72                                                  | Cemip          | 1,803                       | 0,023876 |
| 73                                                  | Ckmt2          | 1,796                       | 0        |
| 74                                                  | Mxra8          | 1,779                       | 0,015809 |
| 75                                                  | Stap2          | 1,776                       | 0,013268 |
| 76                                                  | Matn2          | 1,772                       | 0        |
| 77                                                  | Tnni3k         | 1,754                       | 0,000001 |
| 78                                                  | AABR07032097.1 | 1,737                       | 0,008655 |
| 79                                                  | Gcnt3          | 1,733                       | 0        |
| 80                                                  | Cmtm2a         | 1,669                       | 0,000983 |
| 81                                                  | Chrm2          | 1,666                       | 0,030028 |
| 82                                                  | Spef2          | 1,661                       | 0,000315 |
| 83                                                  | Cd40           | -1,593                      | 0        |
| 84                                                  | F10            | -1,593                      | 0,020272 |
| 85                                                  | Spon1          | 1,586                       | 0        |
| 86                                                  | Rbm44          | -1,585                      | 0,001722 |
| 87                                                  | Myom2          | -1,559                      | 0,000003 |
| 88                                                  | Rsph4a         | 1,551                       | 0,009208 |
| 89                                                  | Atf3           | -1,541                      | 0        |
| 90                                                  | Parp14         | 1,536                       | 0        |
| 91                                                  | MGC105567      | 1,534                       | 0,000001 |
| 92                                                  | Trpm3          | 1,534                       | 0,000009 |
| 93                                                  | Ucn3           | 1,522                       | 0        |
| 94                                                  | Cngb1          | 1,515                       | 0,000001 |
| 95                                                  | Sorcs1         | 1,501                       | 0,00003  |
| 96                                                  | Usp18          | 1,498                       | 0,000002 |
| 97                                                  | Fam129a        | 1,487                       | 0        |
| 98                                                  | Fgb            | 1,486                       | 0        |
| 99                                                  | Krt23          | -1,478                      | 0,000606 |
| 100                                                 | Ihh            | -1,471                      | 0        |

N.B. The gene counts of *Slc40a1* and *AABR07044397.1* are much lower than that for *Cartpt*, therefore, *Cartpt* was selected as the candidate regulated by Piezo1.

Supplemental Table 3

| Differentially expressed genes in si- <i>Piezo2</i> samples |                |                             |          |
|-------------------------------------------------------------|----------------|-----------------------------|----------|
| Rank                                                        | Gene_Name      | log <sub>2</sub> FoldChange | padj     |
| 1                                                           | Ugt2b35        | 1,81                        | 0,000002 |
| 2                                                           | Pzp            | 1,587                       | 0,009461 |
| 3                                                           | Ramp1          | -1,481                      | 0        |
| 4                                                           | LOC100912427   | 1,453                       | 0,002422 |
| 5                                                           | AABR07049286.1 | 1,349                       | 0,00162  |
| 6                                                           | Rbm44          | -1,346                      | 0,009706 |
| 7                                                           | Casp4          | -1,34                       | 0,011042 |
| 8                                                           | Dr1            | -1,314                      | 0,021767 |
| 9                                                           | Tspo2          | -1,303                      | 0,012928 |
| 10                                                          | Akap5          | 1,286                       | 0,001964 |
| 11                                                          | Adgrg2         | 1,28                        | 0,000001 |
| 12                                                          | Cartpt         | 1,278                       | 0,021463 |
| 13                                                          | Hscb           | -1,248                      | 0        |
| 14                                                          | AABR07017104.1 | -1,211                      | 0,01267  |
| 15                                                          | Vim            | -1,184                      | 0,000967 |
| 16                                                          | Trpc5          | 1,174                       | 0,011042 |
| 17                                                          | Uhmk1          | 1,148                       | 0,003075 |
| 18                                                          | AABR07021096.1 | 1,143                       | 0,003847 |
| 19                                                          | Krt23          | -1,128                      | 0,011546 |
| 20                                                          | Cdkl5          | 1,127                       | 0,038318 |
| 21                                                          | Fst            | 1,111                       | 0,004514 |
| 22                                                          | Ctcb1          | -1,109                      | 0,001787 |
| 23                                                          | AABR07015003.1 | 1,103                       | 0,039181 |
| 24                                                          | Cd40           | -1,098                      | 0,000001 |
| 25                                                          | Nefm           | -1,063                      | 0        |
| 26                                                          | Barhl2         | -1,06                       | 0,040191 |
| 27                                                          | Cyp1a1         | 1,05                        | 0,002238 |
| 28                                                          | Car8           | -1,043                      | 0        |
| 29                                                          | Vsig1          | 1,035                       | 0,036856 |
| 30                                                          | Rnd1           | -1,034                      | 0        |
| 31                                                          | Vegp2          | 1,027                       | 0,000009 |
| 32                                                          | Itih1          | 1,025                       | 0,001801 |
| 33                                                          | Tgfb3          | 1,024                       | 0        |
| 34                                                          | Myom2          | -1,011                      | 0,002686 |
| 35                                                          | Col6a6         | 1,01                        | 0,002462 |
| 36                                                          | Lrrc3b         | -1,002                      | 0,030878 |
| 37                                                          | C1s            | 1                           | 0,000409 |
| 38                                                          | Ppm1f          | 0,996                       | 0        |
| 39                                                          | Krt80          | 0,991                       | 0,000002 |
| 40                                                          | Plcx2          | 0,99                        | 0,039837 |
| 41                                                          | Ephx4          | -0,974                      | 0,027793 |
| 42                                                          | Ldhd           | -0,969                      | 0        |
| 43                                                          | Guca2b         | -0,954                      | 0,000014 |
| 44                                                          | Nkrf           | 0,95                        | 0,00162  |
| 45                                                          | Zfp483         | 0,949                       | 0,035614 |
| 46                                                          | Prss53         | 0,939                       | 0        |
| 47                                                          | Slc6a19        | -0,938                      | 0,000001 |
| 48                                                          | Npy1r          | 0,935                       | 0,025565 |
| 49                                                          | Cntnap1        | 0,93                        | 0,000129 |
| 50                                                          | LOC100910275   | 0,927                       | 0,007359 |
| 51                                                          | AABR07026536.1 | 0,924                       | 0,001067 |
| 52                                                          | Camk2a         | -0,923                      | 0,012841 |
| 53                                                          | Nr2f1          | -0,916                      | 0,016137 |
| 54                                                          | Plekhm3        | 0,912                       | 0,028034 |
| 55                                                          | Ccdc190        | -0,908                      | 0,038538 |

| Differentially expressed genes in si-Piezo2 samples |                |                             |          |
|-----------------------------------------------------|----------------|-----------------------------|----------|
| Rank                                                | Gene_Name      | log <sub>2</sub> FoldChange | padj     |
| 56                                                  | Polr3g         | 0,904                       | 0        |
| 57                                                  | Ugt2b37        | 0,894                       | 0,000136 |
| 58                                                  | Gast           | 0,888                       | 0,000091 |
| 59                                                  | Sytl4          | 0,887                       | 0,000001 |
| 60                                                  | Pik3r3         | 0,886                       | 0,004727 |
| 61                                                  | Igfbp2         | -0,884                      | 0,012517 |
| 62                                                  | Ccdc33         | -0,879                      | 0,043536 |
| 63                                                  | LOC297568      | 0,873                       | 0,000099 |
| 64                                                  | Anxa8          | -0,869                      | 0,000017 |
| 65                                                  | Chrn4          | 0,869                       | 0,01248  |
| 66                                                  | Dtx1           | -0,868                      | 0        |
| 67                                                  | Otulinl        | -0,864                      | 0        |
| 68                                                  | Fam126a        | 0,856                       | 0,045331 |
| 69                                                  | Gstm6          | 0,838                       | 0,018226 |
| 70                                                  | Togaram2       | -0,83                       | 0,015962 |
| 71                                                  | Tet1           | 0,83                        | 0,036115 |
| 72                                                  | Gria4          | -0,829                      | 0,043733 |
| 73                                                  | Misp3          | -0,825                      | 0        |
| 74                                                  | Melf1          | 0,819                       | 0,026144 |
| 75                                                  | AABR07010878.1 | 0,818                       | 0,04787  |
| 76                                                  | S100a3         | -0,811                      | 0,000321 |
| 77                                                  | S100a4         | -0,81                       | 0,000058 |
| 78                                                  | F13a1          | 0,808                       | 0,027338 |
| 79                                                  | Ccdc28a        | -0,808                      | 0        |
| 80                                                  | Htra3          | -0,807                      | 0,000005 |
| 81                                                  | Gpr158         | 0,807                       | 0,025494 |
| 82                                                  | Tcp11          | -0,806                      | 0,009413 |
| 83                                                  | Fam89a         | -0,805                      | 0,00029  |
| 84                                                  | LOC100909732   | 0,801                       | 0,020675 |
| 85                                                  | AABR07001037.1 | 0,797                       | 0,002453 |
| 86                                                  | Fyb1           | 0,795                       | 0,000003 |
| 87                                                  | Svep1          | 0,793                       | 0        |
| 88                                                  | Chia           | -0,791                      | 0,007406 |
| 89                                                  | Galnt9         | -0,79                       | 0        |
| 90                                                  | S100a5         | -0,787                      | 0        |
| 91                                                  | Sh3pxd2a       | 0,785                       | 0,018344 |
| 92                                                  | Rasgrp2        | -0,783                      | 0,000025 |
| 93                                                  | Dusp26         | -0,781                      | 0,015707 |
| 94                                                  | Cd276          | -0,779                      | 0        |
| 95                                                  | Gpr88          | -0,768                      | 0        |
| 96                                                  | Rasa2          | 0,767                       | 0,000131 |
| 97                                                  | Zbtb7c         | 0,762                       | 0        |
| 98                                                  | C1r            | 0,76                        | 0,000044 |
| 99                                                  | Cgln1          | 0,751                       | 0,017907 |
| 100                                                 | Osgin1         | 0,749                       | 0,000152 |

Supplemental Table 4

| Differentially expressed genes in si-Piezo1+2 samples |                |                             |          |
|-------------------------------------------------------|----------------|-----------------------------|----------|
| Rank                                                  | Gene_Name      | log <sub>2</sub> FoldChange | padj     |
| 1                                                     | Cartpt         | 3,591                       | 0        |
| 2                                                     | AABR07044631.2 | 3,238                       | 0,000533 |
| 3                                                     | Pzp            | 2,896                       | 0        |
| 4                                                     | Gast           | 2,882                       | 0        |
| 5                                                     | Pdgfrb         | -2,608                      | 0,000132 |
| 6                                                     | Aldh3b1        | 2,501                       | 0,000001 |
| 7                                                     | AABR07034428.1 | 2,417                       | 0,000003 |
| 8                                                     | Lcn1           | 2,417                       | 0,000022 |
| 9                                                     | Chrna3         | 2,328                       | 0,00219  |
| 10                                                    | Sds            | 2,29                        | 0,000584 |
| 11                                                    | AABR07018078.1 | 2,224                       | 0        |
| 12                                                    | Cyp1b1         | 2,02                        | 0,001048 |
| 13                                                    | Cd7            | 1,994                       | 0,000371 |
| 14                                                    | Lgals5         | 1,98                        | 0,002635 |
| 15                                                    | Ugt2b35        | 1,978                       | 0        |
| 16                                                    | Mest           | 1,943                       | 0        |
| 17                                                    | Gper1          | 1,922                       | 0        |
| 18                                                    | Ramp1          | -1,91                       | 0        |
| 19                                                    | Wfdc1          | 1,892                       | 0,000579 |
| 20                                                    | P2rx2          | 1,889                       | 0,000619 |
| 21                                                    | AABR07021096.1 | 1,858                       | 0        |
| 22                                                    | Setdb2         | 1,789                       | 0,039682 |
| 23                                                    | Lamc3          | -1,785                      | 0,005991 |
| 24                                                    | AABR07062138.2 | 1,747                       | 0,008335 |
| 25                                                    | Fam151a        | 1,737                       | 0        |
| 26                                                    | Wnt10b         | 1,732                       | 0,029904 |
| 27                                                    | Mlph           | 1,73                        | 0,019987 |
| 28                                                    | Msln           | 1,597                       | 0        |
| 29                                                    | F2             | 1,563                       | 0        |
| 30                                                    | C1s            | 1,551                       | 0        |
| 31                                                    | Ntsr1          | 1,519                       | 0,00148  |
| 32                                                    | Chnb4          | 1,511                       | 0        |
| 33                                                    | Zim1           | 1,495                       | 0,02876  |
| 34                                                    | Calhm2         | -1,468                      | 0,000439 |
| 35                                                    | Cacng5         | 1,439                       | 0,017475 |
| 36                                                    | Smim23         | -1,431                      | 0,03071  |
| 37                                                    | Rerg           | 1,401                       | 0,010381 |
| 38                                                    | Dkk2           | -1,391                      | 0,00652  |
| 39                                                    | Mmd2           | 1,374                       | 0        |
| 40                                                    | Morn5          | 1,364                       | 0,020874 |
| 41                                                    | Fbn2           | 1,353                       | 0,000005 |
| 42                                                    | Fkbp14         | 1,346                       | 0,034633 |
| 43                                                    | Ptprb          | 1,34                        | 0        |
| 44                                                    | Hk2            | -1,328                      | 0,008382 |
| 45                                                    | Ifi47          | 1,324                       | 0        |
| 46                                                    | AABR07015003.1 | 1,324                       | 0,007501 |
| 47                                                    | Csmd1          | 1,309                       | 0,049169 |
| 48                                                    | Krt80          | 1,306                       | 0        |
| 49                                                    | Tmc3           | -1,292                      | 0,014432 |
| 50                                                    | Piezo1         | -1,29                       | 0        |

| Differentially expressed genes in si-Piezo1+2 samples |              |                |          |
|-------------------------------------------------------|--------------|----------------|----------|
| Rank                                                  | Gene_Name    | log2FoldChange | padj     |
| 51                                                    | Plg          | 1,276          | 0,039707 |
| 52                                                    | Lrguk        | 1,271          | 0,049769 |
| 53                                                    | Atf3         | -1,268         | 0        |
| 54                                                    | Cd40         | -1,259         | 0        |
| 55                                                    | Col28a1      | -1,241         | 0,040681 |
| 56                                                    | Melff        | 1,227          | 0,000108 |
| 57                                                    | C1r          | 1,224          | 0        |
| 58                                                    | Myom2        | -1,217         | 0,000118 |
| 59                                                    | Gcnt3        | 1,212          | 0        |
| 60                                                    | Rbm44        | -1,208         | 0,016331 |
| 61                                                    | Emp1         | -1,199         | 0        |
| 62                                                    | Elfn1        | 1,195          | 0,000006 |
| 63                                                    | Abcg2        | 1,194          | 0,048508 |
| 64                                                    | Smpdl3a      | -1,183         | 0        |
| 65                                                    | Ucn3         | 1,153          | 0,000001 |
| 66                                                    | Dner         | 1,15           | 0        |
| 67                                                    | Oxtr         | 1,149          | 0,017314 |
| 68                                                    | Matn2        | 1,127          | 0        |
| 69                                                    | Pag1         | 1,113          | 0,046024 |
| 70                                                    | Gpr75        | 1,113          | 0,008996 |
| 71                                                    | Akap5        | 1,107          | 0,008117 |
| 72                                                    | LOC100361492 | 1,102          | 0,001376 |
| 73                                                    | Clic6        | 1,095          | 0,001816 |
| 74                                                    | Cald1        | 1,094          | 0,008086 |
| 75                                                    | S100a4       | -1,093         | 0        |
| 76                                                    | Gna15        | -1,088         | 0,000001 |
| 77                                                    | Parp14       | 1,086          | 0        |
| 78                                                    | Rab7b        | -1,083         | 0,000011 |
| 79                                                    | Fst          | 1,082          | 0,004318 |
| 80                                                    | Caps2        | 1,065          | 0,027161 |
| 81                                                    | Svep1        | 1,063          | 0        |
| 82                                                    | Ugt2b37      | 1,049          | 0,000002 |
| 83                                                    | Vegp2        | 1,048          | 0,000003 |
| 84                                                    | Grik1        | 1,046          | 0,009124 |
| 85                                                    | Large2       | 1,023          | 0        |
| 86                                                    | Kitlg        | -1,016         | 0,000004 |
| 87                                                    | Tekt1        | 1,011          | 0,007153 |
| 88                                                    | Acer1        | -1,009         | 0,00074  |
| 89                                                    | Wfikkn2      | 1              | 0,025765 |
| 90                                                    | Galnt18      | 0,985          | 0        |
| 91                                                    | Piwil2       | -0,978         | 0,001295 |
| 92                                                    | Glod5        | 0,972          | 0,000005 |
| 93                                                    | Hs3st2       | 0,964          | 0,000071 |
| 94                                                    | Cngb1        | 0,961          | 0,004965 |
| 95                                                    | Cx3cl1       | -0,951         | 0        |
| 96                                                    | Snx31        | -0,95          | 0,000001 |
| 97                                                    | Fhod3        | -0,945         | 0        |
| 98                                                    | Tslp         | 0,934          | 0,018475 |
| 99                                                    | Efna1        | -0,933         | 0,000034 |
| 100                                                   | Cyp1a1       | 0,933          | 0,006231 |
